# Supplementary material for: Serum Urate Levels and Ultrasound Characteristics of Carotid Atherosclerosis across Obesity Phenotypes
Source: MDPI journal article supplement (doi:10.3390/biomedicines11071897), 2023-07-04
Supplement: s1 [file s1]

# Supplementary Material

## Serum urate levels and ultrasound characteristics of carotid atherosclerosis accross obesity phenotypes

Daniela Efremova<sup>1</sup>, Natalia Ciobanu<sup>1</sup>, Danu Glavan<sup>1</sup>, Pavel Leahu<sup>1,2</sup>, Renata Racila<sup>1,2</sup>,  
Tatiana Bălănuță<sup>1</sup>, Alexandru Matei<sup>1</sup>, Maria Vasileva<sup>1,2</sup>, Cristina Chepte<sup>1</sup>, Paula  
Bîtcă<sup>1</sup>, Cristina Damian<sup>1</sup>, Ana Bondarciuc<sup>1</sup>, Irina Bejenari<sup>1</sup>, Adelina Cojocaru<sup>1</sup>, Diana  
Manea<sup>1</sup>, Mihail Ciocanu<sup>1</sup>, Eremei Zota<sup>1</sup>, Dumitru Ciolac<sup>1,2\*</sup>, Stanislav Groppa<sup>1,2\*</sup>

<sup>1</sup>Department of Neurology, Institute of Emergency Medicine, 2004 Chisinau,  
Republic of Moldova

<sup>2</sup> Department of Neurology, Nicolae Testemițanu State University of Medicine and  
Pharmacy, 2004 Chisinau, Moldova

### **\*Corresponding authors:**

Stanislav A. Groppa, MD, PhD, Prof.

Department of Neurology, Institute of Emergency Medicine, Toma Ciorba street 1,  
MD-2004, Chisinau, Republic of Moldova; Tel: + 373-22-205312; Fax: + 373-22-235300  
Email: stanislav.groppa@usmf.md

Dumitru Ciolac, MD, PhD

Department of Neurology, Institute of Emergency Medicine, Toma Ciorba street 1,  
MD-2004, Chisinau, Republic of Moldova; Tel: + 373-22-925781  
Email: dimaciolac@gmail.com

## Supplementary Figures

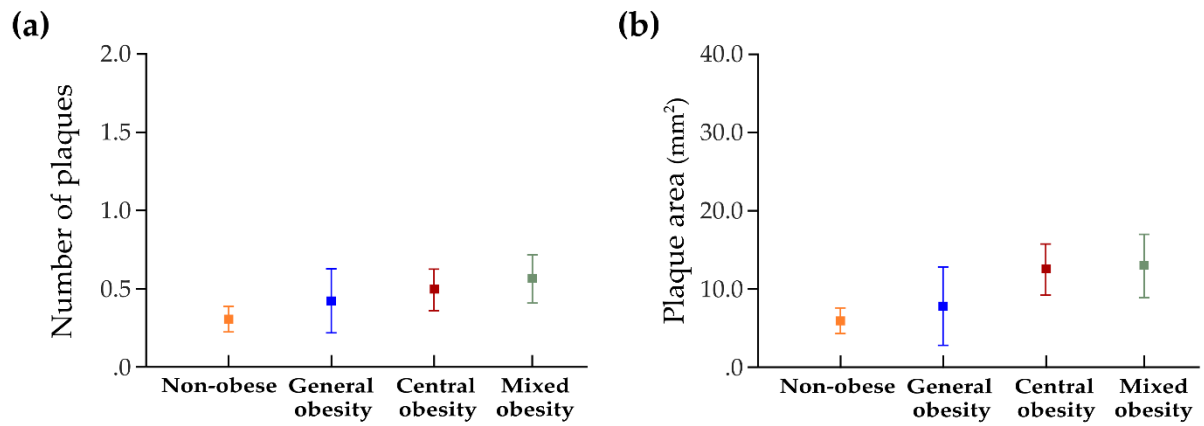

**Figure S1.** Number and area of plaques across subject groups. Comparison of number of the plaques (a) and total area of the plaque (b) between non-obese, subjects with general, central and mixed obesity. Error bars with 95% confidence interval for the mean are shown.

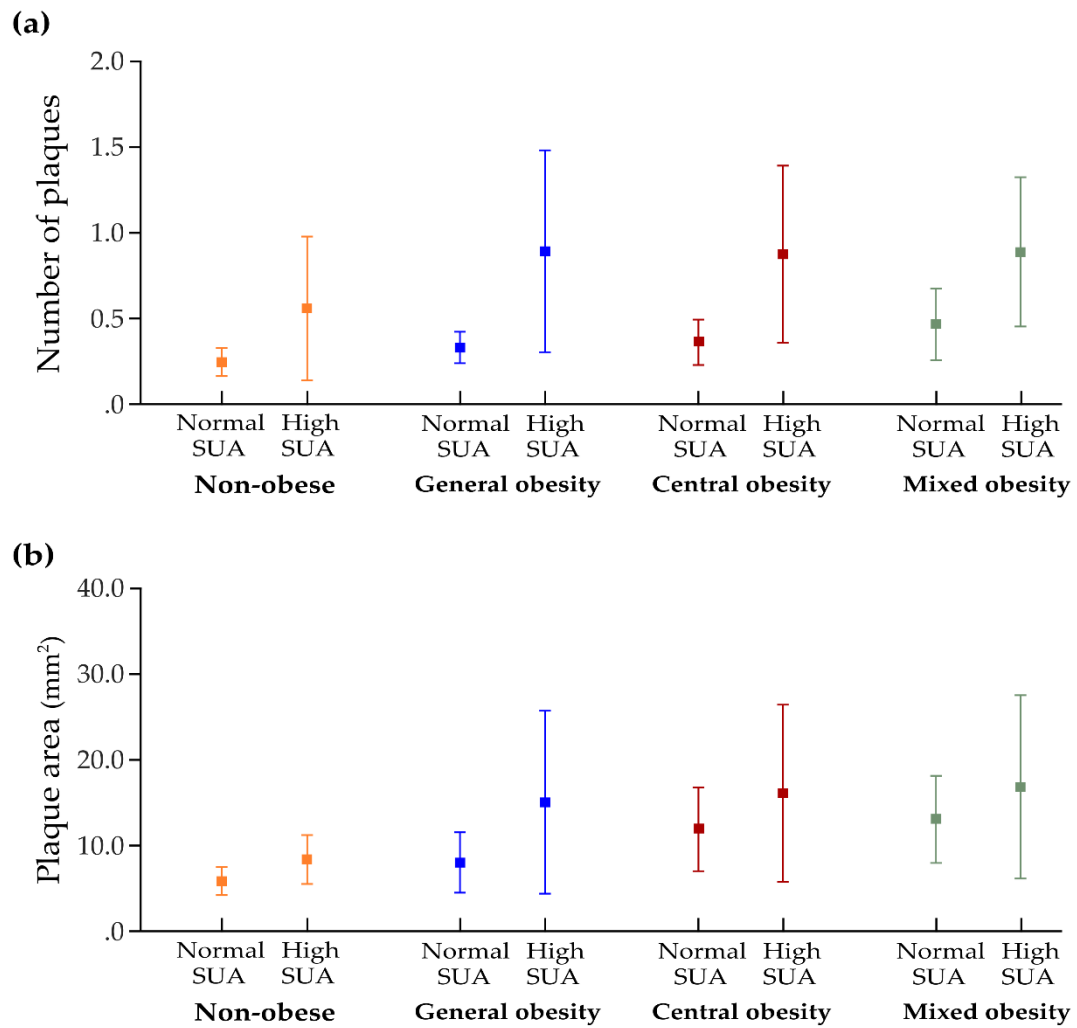

**Figure S2.** Subgroup analysis of number and area of plaques. Comparison of number of the plaques (a) and total area of the plaque (b) between subjects with normal and high serum uric acid (SUA) levels among non-obese, general, central and mixed obesity groups. Error bars with 95% confidence interval for the mean are shown.
